# Supplementary material for: Direct synthesis of hybrid layered double hydroxide–carbon composites supported Pd nanocatalysts efficient in selective hydrogenation of citral
Source: Royal Society of Chemistry journal article supplement (doi:10.1039/c5ra03201f), 2015-01-01
Supplement: c5ra03201f1.pdf [file c5ra03201f1.pdf]

## Supporting Information

### Direct synthesis of hybrid layered double hydroxide-carbon composites supported Pd nanocatalysts efficient in selective hydrogenation of citral

Ruirui Han, Chunshi Nan, Lan Yang, Guoli Fan, Feng Li\*

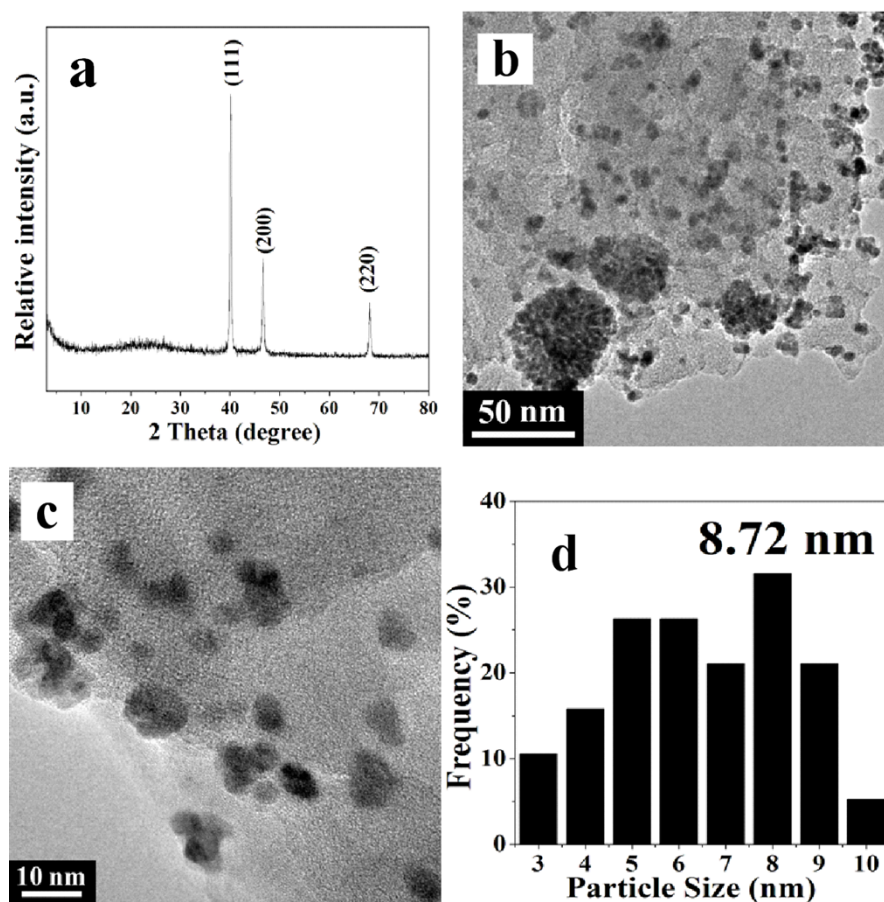

**Fig. S1** XRD patterns (a) and TEM images (b, c) of Pd/AC catalyst, and histogram of the size distribution (d) of Pd nanoparticles.

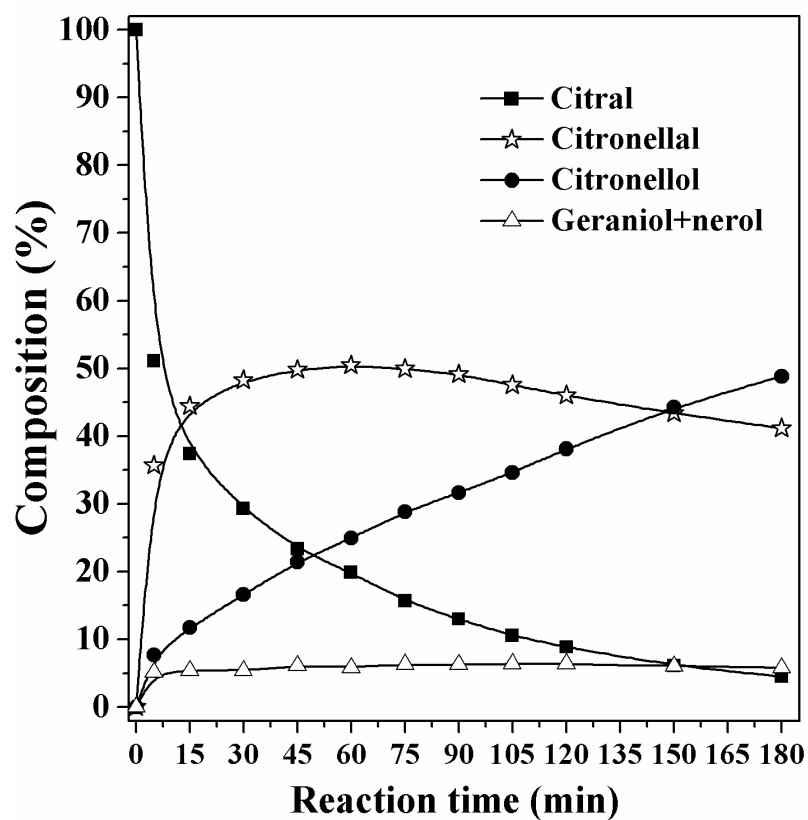

**Fig. S2** Catalytic performance in citral hydrogenation as a function of reaction time over Pd/AC comparison catalyst.
